# Supplementary material for: Identification of clinically achievable combination therapies in childhood rhabdomyosarcoma
Source: PubMed Central journal article supplement (PMC4965487; doi:10.1007/s00280-016-3077-8), 2016-06-20
Supplement: 280_2016_3077_MOESM1_ESM.pdf [file 280_2016_3077_MOESM1_ESM.pdf]

# Identification of Clinically Achievable Combination Therapies in Childhood Rhabdomyosarcoma – Supplementary Figures

Elliot Kahen<sup>1\*</sup>, Diana Yu<sup>1\*</sup>, Douglas Harrison<sup>2</sup>, Justine Clark<sup>1</sup>, Pooja Hingorani<sup>3</sup>, Christopher Cubitt<sup>1,3</sup> and Damon Reed<sup>1,4,5,6</sup>

\*equal contribution

<sup>1</sup>Sunshine Project and Translational Research Lab, <sup>4</sup>Chemical Biology and Molecular Medicine Program, <sup>5</sup>Sarcoma Department, <sup>6</sup>Adolescent and Young Adult Program; H. Lee Moffitt Cancer Center and Research Institute, Tampa, Florida; <sup>2</sup>Division of Pediatrics, MD Anderson Cancer Center, Houston, TX; <sup>3</sup>Center for Cancer and Blood Disorders, Phoenix Children's Hospital, Phoenix, Arizona

Corresponding author: [damon.reed@moffitt.org](mailto:damon.reed@moffitt.org)



Supplemental Fig 2: Frequency graph showing all two-drug combinations that demonstrated FA>0.50 and CI<1.10

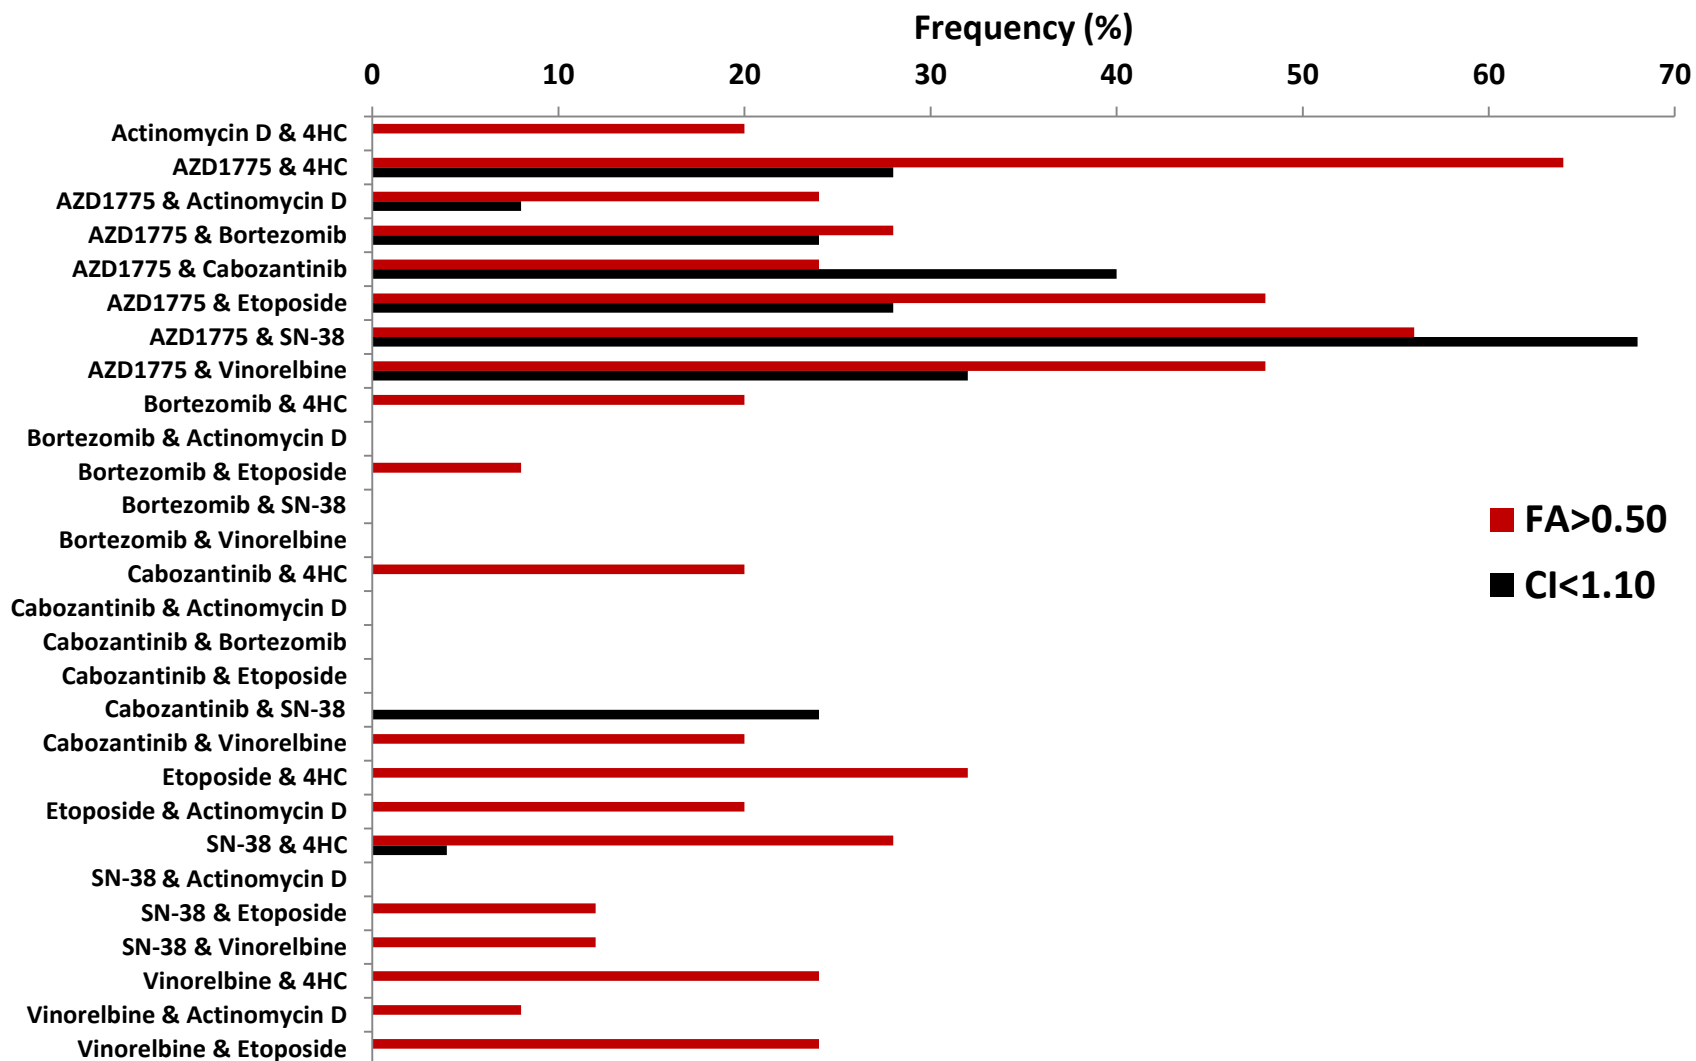

| Agents        | Mechanism |           | Conc (ng/ml) |       | RD     |        | SMS-CTR |       | RH30        |             | RH41        |             | Average     |             | Agents      | Mechanism  |       | Conc (ng/ml) |             | RD          |             | SMS-CTR     |             | RH30        |             | RH41        |       | Average     |             |             |             |
|---------------|-----------|-----------|--------------|-------|--------|--------|---------|-------|-------------|-------------|-------------|-------------|-------------|-------------|-------------|------------|-------|--------------|-------------|-------------|-------------|-------------|-------------|-------------|-------------|-------------|-------|-------------|-------------|-------------|-------------|
|               | Tx1       | Tx2       | Tx1          | Tx2   | FA     | CI     | FA      | CI    | FA          | CI          | FA          | CI          | FA          | CI          |             | Tx1        | Tx2   | Tx1          | Tx2         | Tx1         | Tx2         | FA          | CI          | FA          | CI          | FA          | CI    | FA          | CI          | FA          | CI          |
| Actinomycin D | 4HC       | Alky/ator | Alky/ator    | 2     | 5000   | 0.893  | 3.94    | 0.999 | 0.10        | 0.999       | 0.95        | 0.998       | 1.02        | 1.00 ± 0.05 | 0.69 ± 1.68 | AZD1775    | 4HC   | Wee I        | Alky/ator   | 500         | 5000        | 0.996       | 1.07        | 1.000       | 0.03        | 1.000       | 0.69  | 1.000       | 5.00        | 1.00 ± 0.00 | 1.91 ± 2.24 |
|               |           |           |              | 2500  | 0.650  | 5.00   | 0.998   | 0.07  | 0.381       | 3.00        | 0.452       | 4.93        | 0.61 ± 0.28 | 2.67 ± 2.31 | 2500        |            |       |              |             | 0.934       | 1.37        | 1.000       | 0.03        | 0.996       | 0.60        | 0.996       | 0.78  | 1.00 ± 0.03 | 0.47 ± 0.55 |             |             |
|               |           |           |              | 1250  | 0.614  | 5.00   | 0.491   | 5.00  | 0.212       | 5.00        | 0.359       | 5.00        | 0.35 ± 0.17 | 5.00 ± 0.00 | 1250        |            |       |              |             | 0.891       | 1.14        | 0.830       | 1.11        | 0.905       | 0.78        | 0.978       | 0.91  | 0.90 ± 0.06 | 0.93 ± 0.17 |             |             |
|               |           |           |              | 625   | 0.622  | 5.00   | 0.450   | 5.00  | 0.229       | 5.00        | 0.327       | 5.00        | 0.34 ± 0.17 | 5.00 ± 0.00 | 625         |            |       |              |             | 0.867       | 0.99        | 0.815       | 0.86        | 0.883       | 0.59        | 0.978       | 0.73  | 0.89 ± 0.07 | 0.73 ± 0.17 |             |             |
|               |           |           |              | 313   | 0.642  | 5.00   | 0.417   | 5.00  | 0.178       | 5.00        | 0.314       | 5.00        | 0.30 ± 0.20 | 5.00 ± 0.00 | 313         |            |       |              |             | 0.862       | 0.87        | 0.833       | 0.64        | 0.853       | 0.55        | 0.981       | 0.61  | 0.89 ± 0.07 | 0.60 ± 0.14 |             |             |
|               |           |           |              | 1     | 5000   | 0.836  | 4.22    | 0.999 | 0.09        | 0.999       | 0.96        | 0.998       | 1.01        | 1.00 ± 0.08 | 0.69 ± 1.82 |            |       |              |             | 1           | 5000        | 0.996       | 1.06        | 1.000       | 0.02        | 1.000       | 0.63  | 1.000       | 0.61        | 1.00 ± 0.00 | 0.42 ± 0.43 |
|               |           | 2500      | 0.596        | 5.00  | 0.998  | 0.07   | 0.501   | 1.73  | 0.364       | 3.66        | 0.62 ± 0.27 | 1.82 ± 2.16 | 2500        | 0.879       | 1.46        |            | 1.000 | 0.02         | 0.973       | 0.85        | 0.964       | 1.12        | 0.98 ± 0.05 | 0.66 ± 0.62 |             |             |       |             |             |             |             |
|               |           | 1250      | 0.552        | 5.00  | 0.429  | 5.00   | 0.202   | 4.17  | 0.193       | 4.78        | 0.27 ± 0.18 | 4.63 ± 0.39 | 1250        | 0.823       | 1.09        |            | 0.763 | 1.15         | 0.796       | 0.84        | 0.866       | 1.25        | 0.81 ± 0.04 | 1.08 ± 0.18 |             |             |       |             |             |             |             |
|               |           | 625       | 0.556        | 5.00  | 0.315  | 5.00   | 0.173   | 5.00  | 0.201       | 4.24        | 0.23 ± 0.17 | 4.75 ± 0.38 | 625         | 0.811       | 0.80        |            | 0.742 | 0.81         | 0.689       | 0.72        | 0.845       | 1.09        | 0.76 ± 0.07 | 0.87 ± 0.16 |             |             |       |             |             |             |             |
|               |           | 313       | 0.573        | 5.00  | 0.298  | 5.00   | 0.166   | 5.00  | 0.169       | 4.61        | 0.21 ± 0.19 | 4.87 ± 0.20 | 313         | 0.798       | 0.68        |            | 0.715 | 0.65         | 0.654       | 0.62        | 0.847       | 0.97        | 0.74 ± 0.09 | 0.74 ± 0.16 |             |             |       |             |             |             |             |
|               |           | 0.5       | 5000         | 0.796 | 3.90   | 0.999  | 0.10    | 0.999 | 0.95        | 0.998       | 0.98        | 1.00 ± 0.10 | 0.68 ± 1.66 | 0.5         | 5000        |            | 0.993 | 1.20         | 1.000       | 0.04        | 1.000       | 0.40        | 1.000       | 0.58        | 1.00 ± 0.00 | 0.34 ± 0.49 |       |             |             |             |             |
|               |           | 2500      | 0.489        | 5.00  | 0.997  | 0.08   | 0.534   | 1.50  | 0.214       | 3.38        | 0.58 ± 0.33 | 1.95 ± 2.15 | 2500        | 0.737       | 1.75        |            | 0.985 | 2.20         | 0.888       | 1.09        | 0.841       | 1.40        | 0.91 ± 0.10 | 0.90 ± 0.66 |             |             |       |             |             |             |             |
|               | 1250      | 0.443     | 5.00         | 0.402 | 5.00   | 0.129  | 5.00    | 0.069 | 5.00        | 0.20 ± 0.19 | 5.00 ± 0.00 | 1250        | 0.716       | 1.08        | 0.700       | 1.21       | 0.534 | 1.01         | 0.482       | 1.72        | 0.57 ± 0.12 | 1.31 ± 0.32 |             |             |             |             |       |             |             |             |             |
|               | 625       | 0.380     | 5.00         | 0.280 | 5.00   | 0.002  | 5.00    | 0.078 | 4.31        | 0.12 ± 0.18 | 4.77 ± 0.35 | 625         | 0.645       | 0.85        | 0.647       | 0.84       | 0.361 | 0.93         | 0.528       | 1.29        | 0.51 ± 0.13 | 1.02 ± 0.21 |             |             |             |             |       |             |             |             |             |
|               | 313       | 0.404     | 5.00         | 0.247 | 5.00   | 0.013  | 5.00    | 0.054 | 5.00        | 0.10 ± 0.18 | 5.00 ± 0.00 | 313         | 0.599       | 0.74        | 0.564       | 0.71       | 0.267 | 0.95         | 0.545       | 1.10        | 0.46 ± 0.15 | 0.92 ± 0.19 |             |             |             |             |       |             |             |             |             |
|               | 0.25      | 5000      | 0.726        | 3.98  | 0.998  | 0.11   | 0.999   | 0.95  | 0.996       | 1.05        | 1.00 ± 0.14 | 0.70 ± 1.69 | 0.25        | 5000        | 0.986       | 1.38       | 0.990 | 0.37         | 1.000       | 0.61        | 1.000       | 5.00        | 1.00 ± 0.01 | 1.99 ± 2.15 |             |             |       |             |             |             |             |
|               | 2500      | 0.426     | 5.00         | 0.998 | 0.06   | 0.329  | 1.84    | 0.145 | 2.89        | 0.49 ± 0.37 | 1.60 ± 2.06 | 2500        | 0.654       | 1.77        | 1.000       | 0.03       | 0.639 | 1.40         | 0.801       | 1.26        | 0.81 ± 0.17 | 0.90 ± 0.76 |             |             |             |             |       |             |             |             |             |
|               | 1250      | 0.291     | 5.00         | 0.398 | 3.83   | 0.072  | 5.00    | 0.033 | 4.45        | 0.17 ± 0.17 | 4.43 ± 0.56 | 1250        | 0.602       | 1.08        | 0.662       | 1.24       | 0.384 | 1.01         | 0.279       | 1.59        | 0.44 ± 0.18 | 1.28 ± 0.26 |             |             |             |             |       |             |             |             |             |
|               | 625       | 0.203     | 5.00         | 0.245 | 5.00   | -0.017 | 5.00    | 0.042 | 3.41        | 0.09 ± 0.13 | 4.47 ± 0.79 | 625         | 0.423       | 0.94        | 0.545       | 0.94       | 0.094 | 1.42         | 0.334       | 1.10        | 0.32 ± 0.19 | 1.15 ± 0.23 |             |             |             |             |       |             |             |             |             |
|               | 313       | 0.229     | 5.00         | 0.170 | 5.00   | -0.051 | 5.00    | 0.023 | 4.66        | 0.05 ± 0.13 | 4.89 ± 0.17 | 313         | 0.287       | 0.99        | 0.413       | 0.81       | 0.049 | 1.79         | 0.283       | 1.04        | 0.25 ± 0.15 | 1.21 ± 0.43 |             |             |             |             |       |             |             |             |             |
|               | 0.125     | 5000      | 0.697        | 3.64  | 0.999  | 0.10   | 0.998   | 1.00  | 0.998       | 0.96        | 1.00 ± 0.15 | 0.69 ± 1.53 | 0.125       | 5000        | 0.980       | 1.51       | 1.000 | 0.01         | 1.000       | 0.60        | 1.000       | 5.00        | 1.00 ± 0.01 | 1.87 ± 2.23 |             |             |       |             |             |             |             |
|               | 2500      | 0.379     | 5.00         | 0.997 | 0.08   | 0.495  | 1.45    | 0.101 | 2.57        | 0.53 ± 0.37 | 1.37 ± 2.08 | 2500        | 0.623       | 1.72        | 0.990       | 0.18       | 0.941 | 0.91         | 0.734       | 1.22        | 0.89 ± 0.17 | 0.77 ± 0.64 |             |             |             |             |       |             |             |             |             |
|               | 1250      | 0.211     | 5.00         | 0.406 | 2.93   | 0.011  | 5.00    | 0.019 | 3.62        | 0.15 ± 0.19 | 3.85 ± 1.04 | 1250        | 0.476       | 1.10        | 0.601       | 1.39       | 0.423 | 0.85         | 0.181       | 1.38        | 0.40 ± 0.18 | 1.21 ± 0.26 |             |             |             |             |       |             |             |             |             |
|               | 625       | 0.146     | 5.00         | 0.237 | 5.00   | -0.001 | 5.00    | 0.054 | 1.72        | 0.10 ± 0.10 | 3.91 ± 1.64 | 625         | 0.264       | 0.95        | 0.505       | 0.95       | 0.114 | 0.88         | 0.172       | 1.00        | 0.26 ± 0.17 | 0.94 ± 0.05 |             |             |             |             |       |             |             |             |             |
| 313           | 0.162     | 5.00      | 0.110        | 5.00  | -0.027 | 5.00   | -0.001  | 5.00  | 0.03 ± 0.09 | 5.00 ± 0.00 | 313         | 0.149       | 1.01        | 0.380       | 0.74        | 0.057      | 0.95  | 0.115        | 0.99        | 0.18 ± 0.14 | 0.89 ± 0.12 |             |             |             |             |             |       |             |             |             |             |
| Actinomycin D | AZD1775   | Wee I     | Alky/ator    | 2     | 0.861  | 3.38   | 0.749   | 1.04  | 0.788       | 0.64        | 0.960       | 1.22        | 0.83 ± 0.09 | 0.97 ± 1.23 | AZD1775     | Bortezomib | Wee I | Proteasome   | 500         | 10          | 0.861       | 1.07        | 0.723       | 1.33        | 0.721       | 1.27        | 0.973 | 0.88        | 0.81 ± 0.12 | 1.16 ± 0.21 |             |
|               |           |           |              | 0.5   | 0.836  | 2.58   | 0.747   | 0.89  | 0.737       | 0.75        | 0.970       | 0.85        | 0.82 ± 0.11 | 0.83 ± 0.88 |             |            |       |              | 0.5         | 6.67        | 0.873       | 0.90        | 0.753       | 1.04        | 0.783       | 0.90        | 0.983 | 0.63        | 0.84 ± 0.10 | 0.86 ± 0.17 |             |
|               |           |           |              | 1     | 0.854  | 1.47   | 0.776   | 0.70  | 0.727       | 0.75        | 0.977       | 0.65        | 0.83 ± 0.11 | 0.70 ± 0.39 |             |            |       |              | 1           | 4.45        | 0.872       | 0.83        | 0.771       | 0.87        | 0.818       | 0.70        | 0.988 | 0.49        | 0.86 ± 0.09 | 0.69 ± 0.17 |             |
|               |           |           |              | 0.25  | 0.863  | 1.04   | 0.811   | 0.56  | 0.785       | 0.58        | 0.983       | 0.53        | 0.86 ± 0.09 | 0.56 ± 0.24 |             |            |       |              | 0.25        | 2.97        | 0.871       | 0.78        | 0.755       | 0.85        | 0.826       | 0.61        | 0.988 | 0.47        | 0.86 ± 0.10 | 0.64 ± 0.17 |             |
|               |           |           |              | 0.125 | 0.863  | 0.88   | 0.752   | 0.73  | 0.820       | 0.49        | 0.983       | 0.50        | 0.85 ± 0.10 | 0.58 ± 0.19 |             |            |       |              | 0.125       | 1.98        | 0.874       | 0.74        | 0.786       | 0.71        | 0.815       | 0.59        | 0.989 | 0.42        | 0.86 ± 0.09 | 0.57 ± 0.14 |             |
|               |           |           |              | 250   | 2      | 0.689  | 5.00    | 0.517 | 4.69        | 0.571       | 0.99        | 0.496       | 5.00        | 0.53 ± 0.09 |             |            |       |              | 3.56 ± 1.96 | 250         | 10          | 0.783       | 0.93        | 0.481       | 1.65        | 0.496       | 1.45  | 0.882       | 1.15        | 0.62 ± 0.20 | 1.42 ± 0.32 |
|               |           | 1         | 0.642        | 5.00  | 0.493  | 3.32   | 0.510   | 1.01  | 0.359       | 5.00        | 0.45 ± 0.12 | 3.11 ± 1.89 | 1           | 6.67        |             | 0.776      | 0.82  | 0.481        | 1.40        | 0.530       | 1.12        | 0.893       | 0.95        | 0.63 ± 0.20 | 1.16 ± 0.25 |             |       |             |             |             |             |
|               |           | 0.5       | 0.518        | 5.00  | 0.324  | 5.00   | 0.277   | 2.26  | 0.233       | 5.00        | 0.28 ± 0.13 | 4.09 ± 1.37 | 0.5         | 4.45        |             | 0.794      | 0.69  | 0.530        | 1.08        | 0.569       | 0.89        | 0.900       | 0.83        | 0.67 ± 0.18 | 0.93 ± 0.16 |             |       |             |             |             |             |
|               |           | 0.25      | 0.357        | 5.00  | 0.390  | 2.91   | 0.232   | 2.31  | 0.183       | 5.00        | 0.27 ± 0.10 | 3.41 ± 1.40 | 0.25        | 2.97        |             | 0.798      | 0.62  | 0.445        | 1.23        | 0.601       | 0.73        | 0.912       | 0.72        | 0.65 ± 0.21 | 0.89 ± 0.27 |             |       |             |             |             |             |
|               |           | 0.125     | 0.313        | 5.00  | 0.541  | 0.93   | 0.245   | 1.88  | 0.148       | 5.00        | 0.31 ± 0.17 | 2.60 ± 1.11 | 0.125       | 1.98        |             | 0.793      | 0.60  | 0.558        | 0.83        | 0.549       | 0.76        | 0.918       | 0.66        | 0.67 ± 0.18 | 0.75 ± 0.10 |             |       |             |             |             |             |
|               |           | 125       | 2            | 0.638 | 5.00   | 0.356  | 5.00    | 0.509 | 0.97        | 0.535       | 3.92        | 0.47 ± 0.12 | 3.30 ± 1.91 | 125         |             | 10         | 0.441 | 1.41         | 0.459       | 1.26        | 0.228       | 1.88        | 0.507       | 1.86        | 0.40 ± 0.12 | 1.67 ± 0.31 |       |             |             |             |             |
|               |           | 1         | 0.582        | 5.00  | 0.250  | 5.00   | 0.457   | 0.85  | 0.494       | 2.70        | 0.40 ± 0.14 | 2.85 ± 2.01 | 1           | 6.67        |             | 0.484      | 1.11  | 0.219        | 1.89        | 0.185       | 1.78        | 0.517       | 1.56        | 0.31 ± 0.17 | 1.74 ± 0.35 |             |       |             |             |             |             |
|               | 0.5       | 0.470     | 5.00         | 0.228 | 5.00   | 0.248  | 1.86    | 0.537 | 1.70        | 0.34 ± 0.16 | 2.85 ± 1.86 | 0.5         | 4.45        | 0.515       | 0.92        | 0.186      | 1.85  | 0.210        | 1.40        | 0.546       | 1.30        | 0.31 ± 0.19 | 1.52 ± 0.38 |             |             |             |       |             |             |             |             |
|               | 0.25      | 0.476     | 5.00         | 0.213 | 5.00   | 0.244  | 1.36    | 0.527 | 1.36        | 0.33 ± 0.16 | 2.57 ± 2.10 | 0.25        | 2.97        | 0.501       | 0.82        | 0.157      | 1.63  | 0.209        | 1.25        | 0.577       | 1.11        | 0.33 ± 0.20 | 1.33 ± 0.32 |             |             |             |       |             |             |             |             |
|               | 0.125     | 0.485     | 3.20         | 0.262 | 4.65   | 0.274  | 0.93    | 0.515 | 1.21        | 0.35 ± 0.13 | 2.26 ± 1.75 | 0.125       | 1.98        | 0.506       | 0.81        | 0.092      | 2.75  | 0.235        | 1.04        | 0.595       | 1.00        | 0.31 ± 0.23 | 1.60 ± 0.90 |             |             |             |       |             |             |             |             |
|               | 62.5      | 2         | 0.695        | 5.00  | 0.511  | 4.34   | 0.561   | 0.58  | 0.520       | 3.56        | 0.53 ± 0.09 | 2.83 ± 1.95 | 62.5        | 10          | 0.159       | 2.04       | 0.246 | 1.59         | 0.005       | 5.00        | 0.164       | 2.69        | 0.14 ± 0.10 | 3.09 ± 1.52 |             |             |       |             |             |             |             |
|               | 1         | 0.627     | 5.00         | 0.418 | 5.00   | 0.512  | 0.48    | 0.372 | 2.93        | 0.43 ± 0.11 | 2.80 ± 2.15 | 1           | 6.67        | 0.158       | 1.79        | 0.094      | 2.29  | 0.007        | 5.00        | 0.148       | 2.33        | 0.08 ± 0.07 | 3.21 ± 1.45 |             |             |             |       |             |             |             |             |
|               | 0.5       | 0.505     | 5.00         | 0.327 | 5.00   | 0.324  | 0.87    | 0.251 | 2.54        | 0.30 ± 0.11 | 2.80 ± 2.02 | 0.5         | 4.45        | 0.174       | 1.50        | 0.048      | 3.03  | 0.003        | 5.00        | 0.161       | 1.91        | 0.07 ± 0.08 | 3.31 ± 1.57 |             |             |             |       |             |             |             |             |
|               | 0.25      | 0.365     | 5.00         | 0.289 | 5.00   | 0.286  | 0.73    | 0.187 | 2.16        | 0.25 ± 0.07 | 2.63 ± 2.13 | 0.25        | 2.97        | 0.139       | 1.67        | 0.038      | 3.17  | 0.010        | 5.00        | 0.160       | 1.69        | 0.07 ± 0.07 | 3.29 ± 1.58 |             |             |             |       |             |             |             |             |
|               | 0.125     | 0.284     | 5.00         | 0.502 | 0.49   | 0.268  | 0.59    |       |             |             |             |             |             |             |             |            |       |              |             |             |             |             |             |             |             |             |       |             |             |             |             |

| Agents     | Mechanism |            | Conc (ng/ml) |       | RD    |       | SMS-CTR |        | RH30        |             | RH41        |       | Average     |             | Agents     | Mechanism     |            | Conc (ng/ml) |       | RD           |             | SMS-CTR      |             | RH30   |      | RH41  |      | Average     |             |
|------------|-----------|------------|--------------|-------|-------|-------|---------|--------|-------------|-------------|-------------|-------|-------------|-------------|------------|---------------|------------|--------------|-------|--------------|-------------|--------------|-------------|--------|------|-------|------|-------------|-------------|
|            | Tx1       | Tx2        | Tx1          | Tx2   | FA    | CI    | FA      | CI     | FA          | CI          | FA          | CI    | FA          | CI          |            | Tx1           | Tx2        | Tx1          | Tx2   | Tx1          | Tx2         | FA           | CI          | FA     | CI   | FA    | CI   | FA          | CI          |
| AZD1775    | SN-38     | Wee1       | Topo I       | 5     | 0.916 | 0.55  | 0.920   | 0.29   | 0.935       | 0.37        | 0.990       | 0.38  | 0.95 ± 0.03 | 0.35 ± 0.11 | AZD1775    | Vinorelbine   | Wee1       | Microtubule  | 4     | 0.911        | 1.18        | 0.920        | 1.04        | 0.829  | 0.47 | 0.994 | 0.30 | 0.91 ± 0.07 | 0.61 ± 0.43 |
|            |           |            |              | 2     | 0.893 | 0.63  | 0.910   | 0.30   | 0.880       | 0.51        | 0.987       | 0.44  | 0.93 ± 0.05 | 0.42 ± 0.14 |            |               |            |              | 2     | 0.894        | 0.99        | 0.883        | 0.93        | 0.815  | 0.51 | 0.992 | 0.35 | 0.90 ± 0.07 | 0.60 ± 0.31 |
|            |           |            |              | 1.25  | 0.871 | 0.72  | 0.886   | 0.36   | 0.858       | 0.50        | 0.987       | 0.43  | 0.91 ± 0.06 | 0.43 ± 0.15 |            |               |            |              | 1     | 0.880        | 0.88        | 0.867        | 0.73        | 0.795  | 0.55 | 0.991 | 0.36 | 0.88 ± 0.08 | 0.55 ± 0.22 |
|            |           |            |              | 0.625 | 0.867 | 0.72  | 0.867   | 0.40   | 0.837       | 0.51        | 0.989       | 0.39  | 0.90 ± 0.07 | 0.43 ± 0.15 |            |               |            |              | 0.5   | 0.862        | 0.86        | 0.858        | 0.60        | 0.790  | 0.56 | 0.988 | 0.42 | 0.88 ± 0.08 | 0.53 ± 0.19 |
|            |           |            |              | 0.313 | 0.862 | 0.73  | 0.839   | 0.48   | 0.827       | 0.50        | 0.986       | 0.44  | 0.88 ± 0.07 | 0.47 ± 0.13 |            |               |            |              | 0.25  | 0.852        | 0.85        | 0.833        | 0.59        | 0.776  | 0.60 | 0.988 | 0.41 | 0.87 ± 0.09 | 0.53 ± 0.18 |
|            |           |            |              | 5     | 0.869 | 0.48  | 0.841   | 0.30   | 0.836       | 0.68        | 0.931       | 0.62  | 0.87 ± 0.04 | 0.53 ± 0.17 |            |               |            |              | 4     | 0.890        | 1.15        | 0.880        | 1.37        | 0.802  | 0.28 | 0.988 | 0.26 | 0.89 ± 0.08 | 0.63 ± 0.58 |
|            | 2.5       | 0.838      | 0.51         | 0.792 | 0.35  | 0.783 | 0.61    | 0.912  | 0.66        | 0.83 ± 0.06 | 0.54 ± 0.14 | 2     | 0.869       | 0.87        |            | 0.880         | 0.78       | 0.786        | 0.29  | 0.988        | 0.23        | 0.88 ± 0.08  | 0.43 ± 0.33 |        |      |       |      |             |             |
|            | 1.25      | 0.820      | 0.52         | 0.757 | 0.38  | 0.720 | 0.59    | 0.903  | 0.67        | 0.79 ± 0.08 | 0.55 ± 0.12 | 1     | 0.841       | 0.73        |            | 0.831         | 0.68       | 0.747        | 0.34  | 0.984        | 0.26        | 0.85 ± 0.10  | 0.42 ± 0.24 |        |      |       |      |             |             |
|            | 0.625     | 0.807      | 0.52         | 0.754 | 0.37  | 0.663 | 0.59    | 0.903  | 0.66        | 0.77 ± 0.10 | 0.54 ± 0.12 | 0.5   | 0.832       | 0.61        |            | 0.790         | 0.58       | 0.734        | 0.35  | 0.978        | 0.30        | 0.83 ± 0.10  | 0.41 ± 0.16 |        |      |       |      |             |             |
|            | 0.313     | 0.800      | 0.52         | 0.633 | 0.57  | 0.626 | 0.59    | 0.908  | 0.63        | 0.72 ± 0.14 | 0.59 ± 0.04 | 0.25  | 0.827       | 0.53        |            | 0.793         | 0.44       | 0.738        | 0.35  | 0.980        | 0.27        | 0.84 ± 0.10  | 0.35 ± 0.11 |        |      |       |      |             |             |
|            | 5         | 0.799      | 0.52         | 0.718 | 0.36  | 0.773 | 0.83    | 0.693  | 1.05        | 0.73 ± 0.05 | 0.75 ± 0.31 | 4     | 0.847       | 1.44        |            | 0.896         | 1.10       | 0.582        | 0.36  | 0.934        | 0.57        | 0.80 ± 0.16  | 0.68 ± 0.49 |        |      |       |      |             |             |
|            | 2.5       | 0.778      | 0.44         | 0.637 | 0.39  | 0.695 | 0.71    | 0.571  | 1.18        | 0.63 ± 0.09 | 0.76 ± 0.36 | 2     | 0.688       | 1.95        |            | 0.791         | 1.25       | 0.367        | 0.76  | 0.802        | 1.03        | 0.65 ± 0.20  | 0.51 ± 0.51 |        |      |       |      |             |             |
| 1.25       | 0.741     | 0.43       | 0.629        | 0.34  | 0.561 | 0.75  | 0.537   | 1.12   | 0.58 ± 0.09 | 0.74 ± 0.35 | 1           | 0.526 | 2.20        | 0.469       | 2.62       | 0.203         | 1.57       | 0.611        | 1.51  | 0.43 ± 0.18  | 1.90 ± 0.53 |              |             |        |      |       |      |             |             |
| 0.625      | 0.727     | 0.40       | 0.615        | 0.33  | 0.514 | 0.62  | 0.583   | 0.94   | 0.57 ± 0.09 | 0.63 ± 0.28 | 0.5         | 0.494 | 1.60        | 0.323       | 2.65       | 0.184         | 1.45       | 0.553        | 1.37  | 0.35 ± 0.17  | 1.82 ± 0.60 |              |             |        |      |       |      |             |             |
| 0.313      | 0.636     | 0.52       | 0.450        | 0.52  | 0.369 | 0.77  | 0.588   | 0.90   | 0.47 ± 0.12 | 0.73 ± 0.19 | 0.25        | 0.513 | 1.10        | 0.151       | 4.00       | 0.181         | 1.27       | 0.548        | 1.16  | 0.29 ± 0.21  | 2.14 ± 1.41 |              |             |        |      |       |      |             |             |
| 5          | 0.697     | 0.72       | 0.580        | 0.49  | 0.776 | 0.74  | 0.407   | 1.57   | 0.59 ± 0.16 | 0.93 ± 0.48 | 4           | 0.740 | 2.56        | 0.874       | 1.30       | 0.521         | 0.30       | 0.906        | 0.62  | 0.77 ± 0.17  | 0.74 ± 1.00 |              |             |        |      |       |      |             |             |
| 2.5        | 0.628     | 0.64       | 0.563        | 0.35  | 0.674 | 0.66  | 0.304   | 1.48   | 0.51 ± 0.17 | 0.83 ± 0.49 | 2           | 0.473 | 4.16        | 0.714       | 1.74       | 0.320         | 0.66       | 0.632        | 1.64  | 0.56 ± 0.17  | 1.35 ± 1.49 |              |             |        |      |       |      |             |             |
| 1.25       | 0.646     | 0.41       | 0.526        | 0.30  | 0.521 | 0.70  | 0.321   | 1.09   | 0.46 ± 0.13 | 0.69 ± 0.35 | 1           | 0.361 | 3.54        | 0.445       | 2.61       | 0.205         | 1.08       | 0.451        | 1.87  | 0.37 ± 0.11  | 1.85 ± 1.05 |              |             |        |      |       |      |             |             |
| 0.625      | 0.576     | 0.42       | 0.512        | 0.26  | 0.310 | 0.96  | 0.323   | 0.93   | 0.38 ± 0.13 | 0.71 ± 0.36 | 0.5         | 0.281 | 2.88        | 0.170       | 4.94       | 0.191         | 0.86       | 0.428        | 1.32  | 0.26 ± 0.12  | 2.37 ± 1.84 |              |             |        |      |       |      |             |             |
| 0.313      | 0.337     | 0.83       | 0.246        | 0.60  | 0.107 | 2.01  | 0.257   | 1.02   | 0.20 ± 0.10 | 1.21 ± 0.62 | 0.25        | 0.286 | 1.77        | 0.192       | 2.48       | 0.194         | 0.67       | 0.446        | 0.92  | 0.28 ± 0.12  | 1.36 ± 0.83 |              |             |        |      |       |      |             |             |
| 5          | 0.598     | 1.06       | 0.485        | 0.61  | 0.789 | 0.65  | 0.363   | 1.44   | 0.55 ± 0.18 | 0.90 ± 0.39 | 4           | 0.809 | 1.68        | 0.817       | 1.93       | 0.447         | 0.34       | 0.838        | 0.95  | 0.70 ± 0.19  | 1.07 ± 0.72 |              |             |        |      |       |      |             |             |
| 2.5        | 0.564     | 0.70       | 0.474        | 0.38  | 0.723 | 0.49  | 0.277   | 1.17   | 0.49 ± 0.19 | 0.68 ± 0.35 | 2           | 0.449 | 4.36        | 0.630       | 2.40       | 0.163         | 2.44       | 0.320        | 4.85  | 0.37 ± 0.20  | 3.23 ± 1.28 |              |             |        |      |       |      |             |             |
| 1.25       | 0.540     | 0.47       | 0.431        | 0.29  | 0.535 | 0.58  | 0.202   | 1.05   | 0.39 ± 0.16 | 0.64 ± 0.32 | 1           | 0.207 | 5.00        | 0.155       | 5.00       | 0.034         | 5.00       | 0.120        | 5.00  | 0.10 ± 0.07  | 5.00 ± 0.00 |              |             |        |      |       |      |             |             |
| 0.625      | 0.513     | 0.35       | 0.437        | 0.21  | 0.261 | 0.99  | 0.189   | 0.84   | 0.30 ± 0.15 | 0.68 ± 0.38 | 0.5         | 0.133 | 5.00        | -0.057      | 5.00       | 0.010         | 5.00       | 0.102        | 5.00  | 0.02 ± 0.09  | 5.00 ± 0.00 |              |             |        |      |       |      |             |             |
| 0.313      | 0.221     | 0.95       | 0.151        | 0.61  | 0.039 | 4.41  | 0.130   | 0.91   | 0.11 ± 0.08 | 1.98 ± 1.80 | 0.25        | 0.130 | 3.56        | -0.058      | 5.00       | 0.001         | 5.00       | 0.084        | 3.72  | 0.01 ± 0.08  | 4.57 ± 0.79 |              |             |        |      |       |      |             |             |
| Bortezomib | 4HC       | Proteasome | Allylator    | 5000  | 0.968 | 1.90  | 1.000   | 0.03   | 1.000       | 0.77        | 0.999       | 0.84  | 1.00 ± 0.02 | 0.54 ± 0.77 | Bortezomib | Actinomycin D | Proteasome | Allylator    | 2     | 0.562        | 5.00        | 0.398        | 5.00        | 0.187  | 5.00 | 0.300 | 5.00 | 0.30 ± 0.16 | 5.00 ± 0.00 |
|            |           |            |              | 2500  | 0.402 | 2.52  | 1.000   | 0.05   | 0.876       | 1.43        | 0.699       | 1.73  | 0.86 ± 0.26 | 1.07 ± 1.03 |            |               |            |              | 1     | 0.466        | 5.00        | 0.271        | 5.00        | 0.026  | 5.00 | 0.224 | 4.82 | 0.21 ± 0.14 | 4.94 ± 0.09 |
|            |           |            |              | 1250  | 0.358 | 1.61  | 0.554   | 2.18   | 0.091       | 2.41        | 0.073       | 2.91  | 0.24 ± 0.23 | 2.50 ± 0.54 |            |               |            |              | 0.5   | 0.232        | 5.00        | 0.150        | 5.00        | -0.039 | 5.00 | 0.086 | 5.00 | 0.07 ± 0.12 | 5.00 ± 0.00 |
|            |           |            |              | 625   | 0.209 | 1.31  | 0.454   | 1.76   | 0.026       | 2.69        | 0.053       | 2.71  | 0.18 ± 0.20 | 2.39 ± 0.70 |            |               |            |              | 0.25  | 0.058        | 5.00        | 0.167        | 5.00        | -0.058 | 5.00 | 0.061 | 4.40 | 0.06 ± 0.09 | 4.80 ± 0.30 |
|            |           |            |              | 313   | 0.131 | 1.15  | 0.333   | 1.62   | 0.014       | 2.81        | 0.063       | 2.32  | 0.14 ± 0.14 | 2.25 ± 0.74 |            |               |            |              | 0.125 | 0.029        | 5.00        | 0.233        | 5.00        | -0.046 | 5.00 | 0.050 | 3.55 | 0.08 ± 0.12 | 4.52 ± 0.72 |
|            |           |            |              | 5000  | 0.959 | 1.93  | 1.000   | 0.03   | 0.793       | 2.58        | 1.000       | 0.68  | 0.93 ± 0.10 | 1.09 ± 1.16 |            |               |            |              | 2     | 0.585        | 5.00        | 0.353        | 5.00        | 0.171  | 5.00 | 0.273 | 5.00 | 0.27 ± 0.18 | 5.00 ± 0.00 |
|            | 2500      | 0.361      | 2.42         | 1.000 | 0.06  | 0.798 | 1.44    | 0.541  | 1.75        | 0.78 ± 0.28 | 1.08 ± 0.99 | 1     | 0.485       | 5.00        |            | 0.255         | 5.00       | 0.094        | 5.00  | 0.137        | 5.00        | 0.16 ± 0.18  | 5.00 ± 0.00 |        |      |       |      |             |             |
|            | 1250      | 0.342      | 1.43         | 0.521 | 2.10  | 0.139 | 1.75    | 0.013  | 3.66        | 0.22 ± 0.22 | 2.50 ± 0.99 | 0.5   | 0.230       | 5.00        |            | 0.053         | 5.00       | -0.051       | 5.00  | -0.024       | 5.00        | -0.01 ± 0.13 | 5.00 ± 0.00 |        |      |       |      |             |             |
|            | 625       | 0.178      | 1.12         | 0.349 | 1.89  | 0.018 | 2.19    | 0.004  | 4.51        | 0.12 ± 0.16 | 2.86 ± 1.46 | 0.25  | 0.031       | 5.00        |            | 0.076         | 5.00       | -0.050       | 5.00  | -0.026       | 5.00        | 0.00 ± 0.06  | 5.00 ± 0.00 |        |      |       |      |             |             |
|            | 313       | 0.101      | 0.94         | 0.232 | 1.68  | 0.005 | 2.71    | -0.002 | 5.00        | 0.08 ± 0.11 | 3.13 ± 1.77 | 0.125 | 0.020       | 5.00        |            | 0.233         | 5.00       | -0.029       | 5.00  | -0.028       | 5.00        | -0.01 ± 0.03 | 5.00 ± 0.00 |        |      |       |      |             |             |
|            | 5000      | 0.958      | 1.88         | 1.000 | 0.03  | 1.000 | 5.00    | 1.000  | 0.75        | 1.00 ± 0.02 | 1.93 ± 2.19 | 2     | 0.583       | 5.00        |            | 0.394         | 5.00       | 0.194        | 5.00  | 0.277        | 5.00        | 0.29 ± 0.17  | 5.00 ± 0.00 |        |      |       |      |             |             |
|            | 2500      | 0.375      | 2.26         | 1.000 | 0.02  | 0.673 | 1.51    | 0.576  | 1.53        | 0.75 ± 0.26 | 1.02 ± 0.94 | 1     | 0.466       | 5.00        |            | 0.246         | 5.00       | 0.115        | 5.00  | 0.152        | 5.00        | 0.17 ± 0.16  | 5.00 ± 0.00 |        |      |       |      |             |             |
| 1250       | 0.318     | 1.33       | 0.464        | 2.22  | 0.142 | 1.47  | 0.021   | 2.52   | 0.21 ± 0.19 | 2.07 ± 0.58 | 0.5         | 0.240 | 5.00        | 0.069       | 5.00       | -0.054        | 5.00       | 0.011        | 5.00  | 0.01 ± 0.13  | 5.00 ± 0.00 |              |             |        |      |       |      |             |             |
| 625        | 0.207     | 0.92       | 0.316        | 1.84  | 0.037 | 1.42  | 0.023   | 1.89   | 0.13 ± 0.14 | 1.72 ± 0.45 | 0.25        | 0.065 | 5.00        | 0.125       | 5.00       | -0.052        | 5.00       | -0.038       | 5.00  | 0.01 ± 0.08  | 5.00 ± 0.00 |              |             |        |      |       |      |             |             |
| 313        | 0.066     | 0.83       | 0.191        | 1.63  | 0.036 | 1.13  | -0.002  | 5.00   | 0.07 ± 0.08 | 2.59 ± 1.93 | 0.125       | 0.040 | 5.00        | 0.042       | 5.00       | -0.015        | 5.00       | -0.055       | 5.00  | -0.01 ± 0.05 | 5.00 ± 0.00 |              |             |        |      |       |      |             |             |
| 5000       | 0.930     | 2.08       | 0.976        | 0.68  | 1.000 | 0.47  | 1.000   | 0.70   | 0.99 ± 0.03 | 0.62 ± 0.74 | 2           | 0.603 | 5.00        | 0.425       | 5.00       | 0.202         | 5.00       | 0.269        | 5.00  | 0.30 ± 0.18  | 5.00 ± 0.00 |              |             |        |      |       |      |             |             |
| 2500       | 0.496     | 2.11       | 1.000        | 0.03  | 0.776 | 1.30  | 0.474   | 1.53   | 0.75 ± 0.28 | 0.95 ± 0.88 | 1           | 0.476 | 5.00        | 0.322       | 5.00       | 0.093         | 5.00       | 0.136        | 5.00  | 0.18 ± 0.18  | 5.00 ± 0.00 |              |             |        |      |       |      |             |             |
| 1250       | 0.319     | 1.24       | 0.449        | 2.19  | 0.189 | 1.21  | 0.010   | 2.49   | 0.22 ± 0.19 | 1.96 ± 0.66 | 0.5         | 0.266 | 5.00        | 0.128       | 5.00       | -0.049        | 5.00       | 0.006        | 5.00  | 0.03 ± 0.14  | 5.00 ± 0.00 |              |             |        |      |       |      |             |             |
| 625        | 0.148     | 0.89       | 0.332        | 1.62  | 0.055 | 1.04  | 0.016   | 1.61   | 0.13 ± 0.14 | 1.42 ± 0.38 | 0.25        | 0.080 | 5.00        | 0.044       | 5.00       | -0.039        | 5.00       | -0.012       | 5.00  | 0.00 ± 0.05  | 5.00 ± 0.00 |              |             |        |      |       |      |             |             |
| 313        | 0.056     | 0.72       | 0.228        | 1.28  | 0.059 | 0.75  | -0.018  | 5.00   | 0.09 ± 0.10 | 2.34 ± 2.06 | 0.125       | 0.052 | 5.00        | 0.144       | 5.00       | -0.013        | 5.00       | -0.036       | 5.00  | 0.03 ± 0.08  | 5.00 ± 0.00 |              |             |        |      |       |      |             |             |
| 5000       | 0.956     | 1.84       | 1.000        | 0.04  | 1.000 | 5.00  | 1.000   | 0.71   | 1.00 ± 0.02 | 1.92 ± 2.20 | 2           | 0.591 | 5           |             |            |               |            |              |       |              |             |              |             |        |      |       |      |             |             |

| Agents       |               | Mechanism  |             | Conc (ng/ml) |        | RD     |        | SMS-CTR |              | RH30        |        | RH41   |              | Average      |             | Agents       | Mechanism  | Conc (ng/ml) |            | RD          |             | SMS-CTR |        | RH30   |        | RH41   |        | Average     |              |             |             |      |             |             |
|--------------|---------------|------------|-------------|--------------|--------|--------|--------|---------|--------------|-------------|--------|--------|--------------|--------------|-------------|--------------|------------|--------------|------------|-------------|-------------|---------|--------|--------|--------|--------|--------|-------------|--------------|-------------|-------------|------|-------------|-------------|
| Tx1          | Tx2           | Tx1        | Tx2         | Tx1          | Tx2    | FA     | CI     | FA      | CI           | FA          | CI     | FA     | CI           | FA           | CI          | Tx1          | Tx2        | Tx1          | Tx2        | FA          | CI          | FA      | CI     | FA     | CI     | FA     | CI     | FA          | CI           |             |             |      |             |             |
| Bortezomib   | Vinorelbine   | Proteasome | Microtubule | 10           | 4      | 0.764  | 2.51   | 0.853   | 1.88         | 0.435       | 1.02   | 0.667  | 2.81         | 0.65 ± 0.18  | 1.90 ± 0.79 | Cabozantinib | 4HC        | TKI          | Allyl/ator | 2000        | 5000        | 0.993   | 1.18   | 1.000  | 0.03   | 1.000  | 5.00   | 1.000       | 0.44         | 1.00 ± 0.00 | 1.82 ± 2.27 |      |             |             |
|              |               |            |             |              | 2      | 0.325  | 5.00   | 0.636   | 2.88         | 0.029       | 5.00   | 0.223  | 5.00         | 0.30 ± 0.25  | 4.29 ± 1.06 |              |            |              |            |             | 2500        | 0.383   | 2.37   | 1.000  | 0.02   | 0.997  | 0.56   | 0.927       | 0.86         | 0.97 ± 0.30 | 0.48 ± 1.01 |      |             |             |
|              |               |            |             |              | 1      | 0.087  | 5.00   | 0.381   | 3.90         | -0.015      | 5.00   | 0.084  | 5.00         | 0.15 ± 0.17  | 4.63 ± 0.55 |              |            |              |            |             | 1250        | 0.337   | 1.47   | 0.501  | 1.86   | 0.431  | 1.40   | 0.286       | 1.44         | 0.41 ± 0.10 | 1.57 ± 0.21 |      |             |             |
|              |               |            |             |              | 0.5    | 0.057  | 5.00   | 0.207   | 4.57         | -0.015      | 5.00   | 0.094  | 5.00         | 0.10 ± 0.09  | 4.86 ± 0.22 |              |            |              |            |             | 625         | 0.209   | 1.23   | 0.367  | 1.45   | 0.142  | 3.04   | 0.283       | 1.09         | 0.26 ± 0.10 | 1.86 ± 0.90 |      |             |             |
|              |               |            |             | 0.25         | 0.035  | 5.00   | 0.223  | 2.70    | -0.024       | 5.00        | 0.056  | 5.00   | 0.09 ± 0.11  | 4.23 ± 1.15  | 313         |              |            |              |            | 0.150       | 1.13        | 0.222   | 1.39   | 0.119  | 3.33   | 0.299  | 0.85   | 0.21 ± 0.08 | 1.86 ± 1.12  |             |             |      |             |             |
|              |               |            |             | 6.67         | 4      | 0.732  | 2.77   | 0.856   | 1.71         | 0.463       | 0.70   | 0.661  | 2.65         | 0.66 ± 0.16  | 1.69 ± 0.96 |              |            |              |            | 5000        | 0.965       | 1.71    | 1.000  | 5.00   | 1.000  | 5.00   | 1.000  | 5.00        | 1.000        | 5.00        | 1.000       | 0.32 | 1.00 ± 0.02 | 5.00 ± 1.65 |
|              |               |            |             |              | 2      | 0.259  | 5.00   | 0.575   | 3.34         | 0.035       | 5.00   | 0.122  | 5.00         | 0.24 ± 0.24  | 4.45 ± 0.83 |              |            |              |            | 2500        | 0.359       | 2.23    | 1.000  | 0.02   | 0.968  | 0.82   | 0.907  | 0.89        | 0.96 ± 0.30  | 0.58 ± 0.92 |             |      |             |             |
|              |               |            |             |              | 1      | 0.062  | 5.00   | 0.173   | 5.00         | -0.003      | 5.00   | -0.008 | 5.00         | 0.05 ± 0.08  | 5.00 ± 0.00 |              |            |              |            | 1250        | 0.301       | 1.31    | 0.439  | 2.10   | 0.256  | 1.50   | 0.133  | 1.82        | 0.28 ± 0.13  | 1.81 ± 0.35 |             |      |             |             |
|              |               |            |             |              | 0.5    | 0.037  | 5.00   | 0.046   | 5.00         | -0.010      | 5.00   | -0.017 | 5.00         | 0.01 ± 0.04  | 5.00 ± 0.00 |              |            |              |            | 625         | 0.183       | 0.97    | 0.364  | 1.35   | 0.035  | 5.00   | 0.104  | 1.76        | 0.17 ± 0.14  | 2.70 ± 1.85 |             |      |             |             |
|              |               |            |             | 0.25         | 0.045  | 5.00   | 0.157  | 3.21    | -0.021       | 5.00        | -0.028 | 5.00   | 0.04 ± 0.09  | 4.40 ± 0.90  | 313         |              |            |              |            | 0.056       | 1.17        | 0.247   | 1.07   | 0.030  | 5.00   | 0.126  | 1.26   | 0.13 ± 0.10 | 2.44 ± 1.92  |             |             |      |             |             |
|              |               |            |             | 4.45         | 4      | 0.735  | 2.64   | 0.854   | 1.65         | 0.449       | 0.56   | 0.659  | 2.52         | 0.65 ± 0.17  | 1.58 ± 0.96 |              |            |              |            | 5000        | 0.982       | 1.46    | 1.000  | 0.01   | 1.000  | 5.00   | 1.000  | 0.62        | 1.00 ± 0.01  | 1.88 ± 2.23 |             |      |             |             |
|              |               |            |             |              | 2      | 0.291  | 5.00   | 0.592   | 3.00         | 0.055       | 5.00   | 0.149  | 5.00         | 0.27 ± 0.23  | 4.33 ± 1.00 |              |            |              |            | 2500        | 0.421       | 2.00    | 1.000  | 0.02   | 0.940  | 0.91   | 0.848  | 0.97        | 0.93 ± 0.26  | 0.63 ± 0.81 |             |      |             |             |
|              |               |            |             |              | 1      | -0.008 | 5.00   | 0.170   | 5.00         | -0.005      | 5.00   | 0.014  | 5.00         | 0.06 ± 0.09  | 5.00 ± 0.00 |              |            |              |            | 1250        | 0.277       | 1.23    | 0.408  | 2.23   | 0.183  | 1.38   | 0.059  | 2.23        | 0.22 ± 0.15  | 1.95 ± 0.54 |             |      |             |             |
|              |               |            |             |              | 0.5    | -0.040 | 5.00   | 0.092   | 5.00         | -0.008      | 5.00   | -0.015 | 5.00         | 0.02 ± 0.06  | 5.00 ± 0.00 |              |            |              |            | 625         | 0.163       | 0.83    | 0.378  | 1.24   | 0.001  | 5.00   | 0.048  | 2.06        | 0.14 ± 0.17  | 2.77 ± 1.88 |             |      |             |             |
|              |               |            |             | 0.25         | -0.051 | 5.00   | 0.097  | 4.60    | -0.017       | 5.00        | -0.037 | 5.00   | 0.01 ± 0.07  | 4.87 ± 1.20  | 313         |              |            |              |            | 0.061       | 0.77        | 0.359   | 0.68   | -0.001 | 5.00   | 0.024  | 3.65   | 0.13 ± 0.17 | 3.11 ± 1.15  |             |             |      |             |             |
|              |               |            |             | 2.97         | 4      | 0.731  | 2.64   | 0.860   | 1.52         | 0.444       | 0.46   | 0.658  | 2.44         | 0.65 ± 0.17  | 1.47 ± 1.00 |              |            |              |            | 5000        | 0.828       | 2.52    | 1.000  | 5.00   | 1.000  | 5.00   | 1.000  | 5.00        | 1.000        | 5.00        | 1.000       | 0.09 | 1.00 ± 0.09 | 5.00 ± 2.14 |
|              |               |            |             |              | 2      | 0.272  | 5.00   | 0.587   | 2.96         | 0.047       | 5.00   | 0.086  | 5.00         | 0.24 ± 0.25  | 4.32 ± 1.02 |              |            |              |            | 2500        | 0.340       | 2.12    | 1.000  | 0.02   | 0.929  | 0.93   | 0.872  | 0.94        | 0.93 ± 0.30  | 0.63 ± 0.86 |             |      |             |             |
|              |               |            |             |              | 1      | 0.010  | 5.00   | 0.173   | 5.00         | 0.003       | 5.00   | -0.007 | 5.00         | 0.06 ± 0.09  | 5.00 ± 0.00 |              |            |              |            | 1250        | 0.313       | 1.12    | 0.493  | 1.76   | 0.195  | 1.11   | 0.032  | 2.32        | 0.24 ± 0.19  | 1.73 ± 0.58 |             |      |             |             |
|              |               |            |             |              | 0.5    | -0.058 | 5.00   | 0.023   | 5.00         | -0.001      | 5.00   | -0.006 | 5.00         | 0.01 ± 0.03  | 5.00 ± 0.00 |              |            |              |            | 625         | 0.176       | 0.72    | 0.282  | 1.60   | -0.004 | 5.00   | 0.014  | 3.56        | 0.10 ± 0.14  | 3.39 ± 1.93 |             |      |             |             |
|              |               |            |             | 0.25         | -0.059 | 5.00   | 0.132  | 3.23    | -0.012       | 5.00        | -0.032 | 5.00   | 0.03 ± 0.09  | 4.41 ± 0.89  | 313         |              |            |              |            | 0.082       | 0.53        | 0.130   | 1.55   | -0.018 | 5.00   | -0.019 | 5.00   | 0.03 ± 0.07 | 3.85 ± 2.32  |             |             |      |             |             |
|              |               |            |             | 1.98         | 4      | 0.745  | 2.42   | 0.856   | 1.53         | 0.449       | 0.38   | 0.670  | 2.25         | 0.66 ± 0.17  | 1.39 ± 0.93 |              |            |              |            | 5000        | 0.880       | 2.52    | 1.000  | 5.00   | 1.000  | 0.68   | 1.000  | 0.69        | 1.00 ± 0.06  | 2.12 ± 2.04 |             |      |             |             |
|              |               |            |             |              | 2      | 0.286  | 5.00   | 0.604   | 2.71         | 0.092       | 5.00   | 0.151  | 5.00         | 0.28 ± 0.23  | 4.24 ± 1.15 |              |            |              |            | 2500        | 0.360       | 2.05    | 0.999  | 0.03   | 0.925  | 0.94   | 0.762  | 1.05        | 0.90 ± 0.29  | 0.67 ± 0.83 |             |      |             |             |
|              |               |            |             |              | 1      | 0.026  | 5.00   | 0.174   | 5.00         | -0.009      | 5.00   | 0.024  | 5.00         | 0.06 ± 0.08  | 5.00 ± 0.00 |              |            |              |            | 1250        | 0.310       | 1.09    | 0.388  | 2.31   | 0.180  | 1.02   | 0.065  | 5.00        | 0.19 ± 0.17  | 2.78 ± 1.86 |             |      |             |             |
|              |               |            |             |              | 0.5    | 0.028  | 5.00   | 0.053   | 5.00         | 0.025       | 5.00   | -0.022 | 5.00         | 0.02 ± 0.04  | 5.00 ± 0.00 |              |            |              |            | 625         | 0.141       | 0.72    | 0.279  | 1.60   | 0.017  | 5.00   | 0.009  | 3.14        | 0.09 ± 0.14  | 3.25 ± 1.88 |             |      |             |             |
| 0.25         | -0.072        | 5.00       | 0.014       | 5.00         | -0.023 | 5.00   | -0.036 | 5.00    | -0.01 ± 0.04 | 5.00 ± 0.00 | 313    | 0.065  | 0.49         | 0.152        | 1.33        | -0.025       | 5.00       | -0.048       | 5.00       | 0.03 ± 0.09 | 3.78 ± 2.39 |         |        |        |        |        |        |             |              |             |             |      |             |             |
| Cabozantinib | Actinomycin D | TKI        | Allyl/ator  | 2000         | 2      | 0.615  | 5.00   | 0.393   | 5.00         | 0.249       | 5.00   | 0.396  | 4.64         | 0.35 ± 0.15  | 4.88 ± 0.18 | Cabozantinib | Bortezomib | TKI          | Proteasome | 2000        | 10          | 0.103   | 1.89   | 0.386  | 1.10   | 0.112  | 4.60   | 0.282       | 1.88         | 0.26 ± 0.14 | 2.53 ± 1.53 |      |             |             |
|              |               |            |             |              | 1      | 0.553  | 5.00   | 0.249   | 5.00         | 0.220       | 4.35   | 0.346  | 2.94         | 0.27 ± 0.15  | 4.10 ± 0.97 |              |            |              |            |             | 6.67        | 0.093   | 1.68   | 0.217  | 1.21   | 0.101  | 4.54   | 0.287       | 1.47         | 0.20 ± 0.09 | 2.41 ± 1.56 |      |             |             |
|              |               |            |             |              | 0.5    | 0.354  | 5.00   | 0.192   | 5.00         | 0.151       | 5.00   | 0.308  | 1.99         | 0.22 ± 0.10  | 4.00 ± 1.51 |              |            |              |            |             | 4.45        | 0.118   | 1.31   | 0.152  | 1.23   | 0.080  | 5.00   | 0.265       | 1.33         | 0.17 ± 0.08 | 2.52 ± 1.86 |      |             |             |
|              |               |            |             |              | 0.25   | 0.130  | 5.00   | 0.224   | 5.00         | 0.046       | 5.00   | 0.283  | 1.45         | 0.18 ± 0.10  | 3.82 ± 1.78 |              |            |              |            |             | 2.97        | 0.072   | 1.57   | 0.139  | 1.09   | 0.112  | 3.66   | 0.268       | 1.14         | 0.17 ± 0.08 | 1.96 ± 1.22 |      |             |             |
|              |               |            |             | 0.125        | 0.073  | 5.00   | 0.313  | 2.30    | 0.104        | 5.00        | 0.328  | 0.90   | 0.25 ± 0.13  | 2.73 ± 2.05  | 1.98        |              |            |              |            | 0.079       | 1.40        | 0.130   | 1.01   | 0.097  | 4.08   | 0.265  | 1.03   | 0.16 ± 0.08 | 2.04 ± 1.48  |             |             |      |             |             |
|              |               |            |             | 1000         | 2      | 0.601  | 5.00   | 0.354   | 5.00         | 0.199       | 5.00   | 0.324  | 5.00         | 0.29 ± 0.17  | 5.00 ± 0.00 |              |            |              |            | 10          | 0.044       | 1.94    | 0.323  | 1.10   | 0.026  | 5.00   | 0.105  | 3.03        | 0.15 ± 0.14  | 3.04 ± 1.69 |             |      |             |             |
|              |               |            |             |              | 1      | 0.521  | 5.00   | 0.235   | 5.00         | 0.163       | 5.00   | 0.212  | 4.24         | 0.20 ± 0.16  | 4.75 ± 0.38 |              |            |              |            | 6.67        | 0.026       | 2.00    | 0.122  | 1.37   | 0.010  | 5.00   | 0.072  | 3.34        | 0.07 ± 0.05  | 3.24 ± 1.61 |             |      |             |             |
|              |               |            |             |              | 0.5    | 0.299  | 5.00   | 0.084   | 5.00         | -0.019      | 5.00   | 0.144  | 3.38         | 0.07 ± 0.13  | 4.46 ± 0.81 |              |            |              |            | 4.45        | 0.070       | 1.08    | 0.000  | 5.00   | 0.019  | 5.00   | 0.093  | 2.31        | 0.04 ± 0.04  | 4.10 ± 1.97 |             |      |             |             |
|              |               |            |             |              | 0.25   | 0.096  | 5.00   | 0.224   | 5.00         | -0.035      | 5.00   | 0.085  | 3.47         | 0.09 ± 0.11  | 4.49 ± 0.77 |              |            |              |            | 2.97        | 0.005       | 3.84    | 0.019  | 2.78   | 0.003  | 5.00   | 0.084  | 2.25        | 0.04 ± 0.04  | 3.34 ± 1.22 |             |      |             |             |
|              |               |            |             | 0.125        | 0.062  | 5.00   | 0.008  | 5.00    | 0.005        | 5.00        | 0.105  | 2.08   | 0.04 ± 0.05  | 4.03 ± 1.46  | 1.98        |              |            |              |            | 0.027       | 1.40        | 0.109   | 0.73   | 0.019  | 5.00   | 0.075  | 2.32   | 0.07 ± 0.04 | 2.68 ± 1.88  |             |             |      |             |             |
|              |               |            |             | 500          | 2      | 0.607  | 5.00   | 0.373   | 5.00         | 0.196       | 5.00   | 0.277  | 5.00         | 0.28 ± 0.18  | 5.00 ± 0.00 |              |            |              |            | 10          | 0.046       | 1.47    | 0.248  | 1.19   | 0.009  | 5.00   | 0.018  | 5.00        | 0.09 ± 0.11  | 3.73 ± 2.12 |             |      |             |             |
|              |               |            |             |              | 1      | 0.499  | 5.00   | 0.220   | 5.00         | 0.146       | 5.00   | 0.173  | 4.69         | 0.18 ± 0.16  | 4.90 ± 0.16 |              |            |              |            | 6.67        | 0.034       | 1.27    | 0.041  | 2.00   | 0.021  | 5.00   | 0.007  | 5.00        | 0.02 ± 0.01  | 4.00 ± 1.97 |             |      |             |             |
|              |               |            |             |              | 0.5    | 0.309  | 5.00   | 0.071   | 5.00         | -0.028      | 5.00   | 0.064  | 5.00         | 0.04 ± 0.14  | 5.00 ± 0.00 |              |            |              |            | 4.45        | 0.005       | 2.34    | -0.012 | 5.00   | -0.001 | 5.00   | -0.007 | 5.00        | -0.01 ± 0.01 | 5.00 ± 1.33 |             |      |             |             |
|              |               |            |             |              | 0.25   | 0.048  | 5.00   | 0.012   | 5.00         | -0.050      | 5.00   | 0.004  | 5.00         | -0.01 ± 0.04 | 5.00 ± 0.00 |              |            |              |            | 2.97        | 0.022       | 1.04    | -0.044 | 5.00   | 0.014  | 5.00   | 0.001  | 5.00        | -0.01 ± 0.03 | 5.00 ± 1.98 |             |      |             |             |
|              |               |            |             | 0.125        | 0.011  | 5.00   | -0.026 | 5.00    | -0.014       | 5.00        | 0.018  | 5.00   | -0.01 ± 0.02 | 5.00 ± 0.00  | 1.98        |              |            |              |            | 0.023       | 0.89        | 0.086   | 0.60   | 0.024  | 3.93   | 0.015  | 5.00   | 0.04 ± 0.03 | 3.18 ± 2.19  |             |             |      |             |             |
|              |               |            |             | 250          | 2      | 0.583  | 5.00   | 0.362   | 5.00         | 0.180       | 5.00   | 0.271  | 5.00         | 0.27 ± 0.17  | 5.00 ± 0.00 |              |            |              |            | 10          | 0.047       | 1.25    | 0.248  | 1.14   | 0.009  | 5.00   | -0.027 | 5.00        | 0.08 ± 0.12  | 3.71 ± 2.20 |             |      |             |             |
|              |               |            |             |              | 1      | 0.497  | 5.00   | 0.306   | 5.00         | 0.120       | 5.00   | 0.165  | 4.68         | 0.20 ± 0.17  | 4.89 ± 0.16 |              |            |              |            | 6.67        | 0.039       | 0.96    | 0.016  | 2.67   | 0.000  | 5.00   | -0.037 | 5.00        | -0.01 ± 0.03 | 4.22 ± 1.97 |             |      |             |             |
|              |               |            |             |              | 0.5    | 0.294  | 5.00   | 0.054   | 5.00         | -0.023      | 5.00   | 0.032  | 5.00         | 0.02 ± 0.14  | 5.00 ± 0.00 |              |            |              |            | 4.45        | 0.015       | 1.02    | 0.006  | 3.27   | 0.008  | 5.00   | -0.039 | 5.00        | -0.01 ± 0.02 | 4.42 ± 1.89 |             |      |             |             |
|              |               |            |             |              | 0.25   | 0.119  | 5.00   | 0.155   | 5.00         | -0.062      | 5.00   | -0.026 | 5.00         | 0.02 ± 0.11  | 5.00 ± 0.00 |              |            |              |            | 2.97        | 0.029       | 0.63    | 0.025  | 1.18   | 0.010  | 4.80   | 0.030  | 5.00        | 0.00 ± 0.03  | 3.66 ± 2.32 |             |      |             |             |
|              |               |            |             | 0.125        | 0.010  | 5.00   | 0.051  | 5.00    | -0.018       | 5.00        | 0.006  | 5.00   | 0.01 ± 0.03  | 5.00 ± 0.00  | 1.98        |              |            |              |            | 0.016       | 0.67        | -0.043  | 5.00   |        |        |        |        |             |              |             |             |      |             |             |

| Agents       |               | Mechanism |             | Conc (ng/ml) |       | RD     |        | SMS-CTR |             | RH30        |             | RH41        |       | Average     |             | Agents    |      | Mechanism |           | Conc (ng/ml) |             | RD          |             | SMS-CTR     |             | RH30  |      | RH41  |      | Average     |             |
|--------------|---------------|-----------|-------------|--------------|-------|--------|--------|---------|-------------|-------------|-------------|-------------|-------|-------------|-------------|-----------|------|-----------|-----------|--------------|-------------|-------------|-------------|-------------|-------------|-------|------|-------|------|-------------|-------------|
| Tx1          | Tx2           | Tx1       | Tx2         | Tx1          | Tx2   | FA     | CI     | FA      | CI          | FA          | CI          | FA          | CI    | FA          | CI          | Tx1       | Tx2  | Tx1       | Tx2       | Tx1          | Tx2         | FA          | CI          | FA          | CI          | FA    | CI   | FA    | CI   | FA          | CI          |
| Cabozantinib | Vinorelbine   | TKI       | Microtubule | 2000         | 4     | 0.647  | 3.92   | 0.804   | 2.10        | 0.584       | 0.46        | 0.853       | 0.80  | 0.75 ± 0.13 | 1.12 ± 1.57 | Etoposide | 4HC  | Topo II   | Alkylator | 5000         | 5000        | 0.903       | 2.73        | 0.999       | 0.09        | 0.999 | 1.00 | 0.998 | 1.00 | 1.00 ± 0.05 | 0.70 ± 1.10 |
|              |               |           |             |              | 2     | 0.431  | 4.80   | 0.635   | 2.38        | 0.382       | 0.99        | 0.735       | 0.87  | 0.58 ± 0.17 | 1.42 ± 1.83 |           |      |           |           |              | 2500        | 0.592       | 5.00        | 0.998       | 0.06        | 0.999 | 1.84 | 0.842 | 0.91 | 0.98 ± 0.19 | 0.94 ± 2.16 |
|              |               |           |             |              | 1     | 0.270  | 5.00   | 0.411   | 2.89        | 0.495       | 1.86        | 0.238       | 0.86  | 0.38 ± 0.12 | 2.04 ± 1.61 |           |      |           |           |              | 1250        | 0.617       | 5.00        | 0.622       | 2.76        | 0.895 | 2.90 | 0.981 | 3.55 | 0.79 ± 0.15 | 3.07 ± 1.02 |
|              |               |           |             |              | 0.5   | 0.149  | 5.00   | 0.273   | 2.75        | 0.158       | 2.88        | 0.387       | 1.28  | 0.27 ± 0.11 | 2.30 ± 1.53 |           |      |           |           |              | 625         | 0.625       | 5.00        | 0.549       | 3.51        | 0.878 | 3.04 | 0.855 | 2.97 | 0.76 ± 0.16 | 3.17 ± 0.94 |
|              |               |           |             |              | 0.25  | 0.147  | 3.22   | 0.285   | 1.46        | 0.145       | 2.88        | 0.331       | 1.10  | 0.25 ± 0.10 | 1.81 ± 1.04 |           |      |           |           |              | 313         | 0.637       | 4.90        | 0.494       | 4.69        | 0.870 | 3.09 | 0.856 | 2.81 | 0.74 ± 0.18 | 3.53 ± 1.07 |
|              |               |           |             |              | 4     | 0.731  | 2.60   | 0.822   | 1.85        | 0.557       | 0.30        | 0.783       | 1.24  | 0.72 ± 0.12 | 1.13 ± 0.97 |           |      |           |           |              | 5000        | 0.910       | 2.25        | 0.999       | 0.09        | 0.996 | 1.17 | 0.998 | 0.96 | 1.00 ± 0.04 | 0.74 ± 0.89 |
|              |               | 2         | 0.390       | 5.00         | 0.605 | 2.63   | 0.240  | 1.51    | 0.421       | 3.11        | 0.42 ± 0.15 | 2.42 ± 1.46 | 2500  | 0.458       | 4.82        |           |      | 0.999     | 0.05      | 0.933        | 1.31        | 0.927       | 1.13        | 0.95 ± 0.25 | 0.83 ± 2.07 |       |      |       |      |             |             |
|              |               | 1         | 0.146       | 5.00         | 0.294 | 4.51   | 0.097  | 5.00    | 0.219       | 4.24        | 0.20 ± 0.09 | 4.58 ± 0.98 | 1250  | 0.455       | 3.95        |           |      | 0.469     | 3.14      | 0.679        | 2.64        | 0.363       | 5.00        | 0.50 ± 0.13 | 3.59 ± 1.03 |       |      |       |      |             |             |
|              |               | 0.5       | 0.072       | 5.00         | 0.213 | 3.49   | 0.044  | 5.00    | 0.148       | 3.85        | 0.13 ± 0.08 | 4.11 ± 0.78 | 625   | 0.445       | 3.64        |           |      | 0.396     | 3.44      | 0.658        | 2.52        | 0.416       | 5.00        | 0.49 ± 0.12 | 3.65 ± 1.02 |       |      |       |      |             |             |
|              |               | 0.25      | 0.045       | 5.00         | 0.104 | 4.04   | 0.041  | 5.00    | 0.139       | 2.53        | 0.09 ± 0.05 | 3.86 ± 1.17 | 313   | 0.491       | 2.74        |           |      | 0.378     | 3.26      | 0.600        | 2.90        | 0.421       | 5.00        | 0.47 ± 0.10 | 3.72 ± 1.04 |       |      |       |      |             |             |
|              |               | 4         | 0.768       | 2.11         | 0.829 | 1.76   | 0.563  | 0.19    | 0.722       | 1.69        | 0.70 ± 0.11 | 1.21 ± 0.85 | 5000  | 0.877       | 2.34        |           |      | 0.999     | 0.09      | 0.999        | 0.94        | 0.998       | 0.96        | 1.00 ± 0.06 | 0.66 ± 0.93 |       |      |       |      |             |             |
|              |               | 2         | 0.382       | 5.00         | 0.620 | 2.45   | 0.194  | 1.66    | 0.299       | 5.00        | 0.37 ± 0.18 | 3.10 ± 1.66 | 2500  | 0.434       | 2.93        |           |      | 0.998     | 0.05      | 0.756        | 1.53        | 0.928       | 0.91        | 0.89 ± 0.25 | 0.83 ± 1.13 |       |      |       |      |             |             |
|              | 1             | 0.124     | 5.00        | 0.262        | 5.00  | 0.056  | 5.00   | 0.122   | 5.00        | 0.15 ± 0.09 | 5.00 ± 0.00 | 1250        | 0.401 | 1.98        | 0.590       |           | 1.48 | 0.305     | 2.80      | 0.132        | 5.00        | 0.34 ± 0.19 | 3.09 ± 1.55 |             |             |       |      |       |      |             |             |
|              | 0.5           | 0.048     | 5.00        | 0.077        | 5.00  | 0.035  | 5.00   | 0.062   | 5.00        | 0.06 ± 0.02 | 5.00 ± 0.00 | 625         | 0.358 | 1.77        | 0.349       |           | 2.14 | 0.135     | 5.00      | 0.150        | 5.00        | 0.21 ± 0.12 | 4.05 ± 1.76 |             |             |       |      |       |      |             |             |
|              | 0.25          | 0.032     | 5.00        | 0.055        | 5.00  | 0.040  | 5.00   | 0.058   | 5.00        | 0.05 ± 0.01 | 5.00 ± 0.00 | 313         | 0.350 | 1.57        | 0.413       |           | 1.04 | 0.050     | 5.00      | 0.150        | 5.00        | 0.20 ± 0.17 | 3.68 ± 2.14 |             |             |       |      |       |      |             |             |
|              | 4             | 0.784     | 1.91        | 0.831        | 1.73  | 0.545  | 0.16   | 0.683   | 2.01        | 0.69 ± 0.13 | 1.30 ± 0.87 | 5000        | 0.884 | 2.27        | 0.999       |           | 0.09 | 0.999     | 0.95      | 0.998        | 0.96        | 1.00 ± 0.06 | 0.66 ± 0.90 |             |             |       |      |       |      |             |             |
|              | 2             | 0.370     | 5.00        | 0.615        | 2.49  | 0.157  | 2.65   | 0.213   | 5.00        | 0.33 ± 0.21 | 3.38 ± 1.40 | 2500        | 0.404 | 2.19        | 0.998       |           | 0.05 | 0.827     | 1.15      | 0.888        | 0.94        | 0.90 ± 0.26 | 0.71 ± 0.88 |             |             |       |      |       |      |             |             |
|              | 1             | 0.108     | 5.00        | 0.203        | 5.00  | 0.038  | 5.00   | 0.066   | 5.00        | 0.10 ± 0.07 | 5.00 ± 0.00 | 1250        | 0.359 | 1.33        | 0.426       |           | 2.19 | 0.114     | 2.45      | 0.082        | 5.00        | 0.21 ± 0.17 | 3.21 ± 1.58 |             |             |       |      |       |      |             |             |
|              | 0.5           | 0.046     | 5.00        | 0.077        | 5.00  | 0.008  | 5.00   | 0.020   | 5.00        | 0.04 ± 0.03 | 5.00 ± 0.00 | 625         | 0.185 | 1.60        | 0.301       |           | 1.81 | 0.026     | 5.00      | 0.078        | 5.00        | 0.13 ± 0.12 | 3.94 ± 1.90 |             |             |       |      |       |      |             |             |
|              | 0.25          | -0.001    | 5.00        | -0.008       | 5.00  | 0.014  | 5.00   | 0.025   | 5.00        | 0.01 ± 0.02 | 5.00 ± 0.00 | 313         | 0.095 | 2.97        | 0.208       |           | 1.88 | 0.018     | 5.00      | 0.052        | 5.00        | 0.09 ± 0.08 | 3.96 ± 1.55 |             |             |       |      |       |      |             |             |
|              | 4             | 0.779     | 1.96        | 0.829        | 1.75  | 0.527  | 0.15   | 0.692   | 1.93        | 0.68 ± 0.13 | 1.28 ± 0.87 | 5000        | 0.852 | 2.41        | 0.999       |           | 0.08 | 0.999     | 0.97      | 0.998        | 0.96        | 1.00 ± 0.07 | 0.67 ± 0.96 |             |             |       |      |       |      |             |             |
|              | 2             | 0.330     | 5.00        | 0.625        | 2.38  | 0.142  | 3.18   | 0.184   | 5.00        | 0.32 ± 0.22 | 3.52 ± 1.32 | 2500        | 0.400 | 2.01        | 0.998       |           | 0.05 | 0.676     | 1.28      | 0.733        | 1.10        | 0.80 ± 0.25 | 0.81 ± 0.81 |             |             |       |      |       |      |             |             |
|              | 1             | 0.091     | 5.00        | 0.137        | 5.00  | 0.025  | 5.00   | 0.062   | 5.00        | 0.07 ± 0.05 | 5.00 ± 0.00 | 1250        | 0.327 | 1.14        | 0.481       |           | 1.82 | 0.158     | 1.18      | 0.089        | 1.90        | 0.24 ± 0.18 | 1.63 ± 0.41 |             |             |       |      |       |      |             |             |
|              | 0.5           | 0.019     | 5.00        | 0.059        | 5.00  | 0.004  | 5.00   | 0.004   | 5.00        | 0.02 ± 0.03 | 5.00 ± 0.00 | 625         | 0.161 | 0.95        | 0.307       |           | 1.52 | 0.035     | 1.69      | 0.080        | 1.59        | 0.14 ± 0.12 | 1.60 ± 0.33 |             |             |       |      |       |      |             |             |
| 0.25         | 0.023         | 5.00      | 0.039       | 5.00         | 0.032 | 5.00   | -0.001 | 5.00    | 0.02 ± 0.02 | 5.00 ± 0.00 | 313         | 0.096       | 1.01  | 0.180       | 1.45        | 0.057     | 0.99 | 0.027     | 4.26      | 0.09 ± 0.07  | 2.23 ± 1.57 |             |             |             |             |       |      |       |      |             |             |
| Etoposide    | Actinomycin D | Topo II   | Alkylator   | 5000         | 2     | 0.779  | 5.00   | 0.545   | 5.00        | 0.887       | 2.61        | 0.921       | 1.96  | 0.78 ± 0.17 | 3.19 ± 1.59 | SN-38     | 4HC  | Topo I    | Alkylator | 5000         | 5000        | 0.996       | 1.01        | 1.000       | 5.00        | 1.000 | 0.64 | 1.000 | 0.65 | 1.00 ± 0.00 | 2.10 ± 2.12 |
|              |               |           |             |              | 1     | 0.707  | 5.00   | 0.525   | 5.00        | 0.866       | 3.07        | 0.908       | 1.93  | 0.77 ± 0.17 | 3.33 ± 1.52 |           |      |           |           |              | 2500        | 0.652       | 2.23        | 0.987       | 0.21        | 0.988 | 0.72 | 0.895 | 1.03 | 0.96 ± 0.16 | 0.65 ± 0.86 |
|              |               |           |             |              | 0.5   | 0.692  | 5.00   | 0.540   | 3.75        | 0.861       | 3.18        | 0.892       | 2.08  | 0.76 ± 0.16 | 3.00 ± 1.22 |           |      |           |           |              | 1250        | 0.579       | 1.85        | 0.602       | 1.60        | 0.860 | 0.90 | 0.469 | 1.41 | 0.64 ± 0.17 | 1.30 ± 0.40 |
|              |               |           |             |              | 0.25  | 0.647  | 5.00   | 0.510   | 4.25        | 0.855       | 3.30        | 0.885       | 2.14  | 0.75 ± 0.18 | 3.23 ± 1.24 |           |      |           |           |              | 625         | 0.576       | 1.45        | 0.544       | 1.15        | 0.849 | 0.68 | 0.460 | 1.11 | 0.62 ± 0.17 | 0.98 ± 0.32 |
|              |               |           |             |              | 0.125 | 0.647  | 5.00   | 0.582   | 2.24        | 0.856       | 3.29        | 0.867       | 2.50  | 0.77 ± 0.15 | 2.68 ± 1.24 |           |      |           |           |              | 313         | 0.560       | 1.34        | 0.544       | 0.76        | 0.843 | 0.56 | 0.476 | 0.91 | 0.62 ± 0.16 | 0.75 ± 0.33 |
|              |               |           |             |              | 2     | 0.679  | 5.00   | 0.445   | 5.00        | 0.614       | 2.89        | 0.751       | 3.02  | 0.60 ± 0.13 | 3.64 ± 1.18 |           |      |           |           |              | 5000        | 0.994       | 1.15        | 1.000       | 5.00        | 1.000 | 5.00 | 1.000 | 0.69 | 1.00 ± 0.00 | 3.56 ± 2.36 |
|              |               | 1         | 0.604       | 5.00         | 0.430 | 5.00   | 0.566  | 3.29    | 0.596       | 4.41        | 0.53 ± 0.08 | 4.23 ± 0.81 | 2500  | 0.547       | 2.31        |           |      | 1.000     | 5.00      | 0.944        | 0.96        | 0.868       | 1.01        | 0.94 ± 0.20 | 2.32 ± 1.89 |       |      |       |      |             |             |
|              |               | 0.5       | 0.549       | 5.00         | 0.388 | 5.00   | 0.566  | 3.20    | 0.560       | 4.41        | 0.50 ± 0.09 | 4.20 ± 0.85 | 1250  | 0.484       | 1.74        |           |      | 0.571     | 1.59      | 0.780        | 0.90        | 0.295       | 1.41        | 0.55 ± 0.20 | 1.30 ± 0.37 |       |      |       |      |             |             |
|              |               | 0.25      | 0.503       | 5.00         | 0.378 | 4.65   | 0.560  | 3.21    | 0.545       | 4.33        | 0.49 ± 0.08 | 4.06 ± 0.77 | 625   | 0.459       | 1.41        |           |      | 0.524     | 1.01      | 0.755        | 0.66        | 0.291       | 1.06        | 0.52 ± 0.19 | 0.91 ± 0.31 |       |      |       |      |             |             |
|              |               | 0.125     | 0.486       | 5.00         | 0.389 | 3.32   | 0.594  | 2.81    | 0.483       | 5.00        | 0.49 ± 0.08 | 3.71 ± 1.14 | 313   | 0.476       | 1.10        |           |      | 0.434     | 0.83      | 0.579        | 0.51        | 0.267       | 0.96        | 0.49 ± 0.20 | 0.76 ± 0.25 |       |      |       |      |             |             |
|              |               | 2         | 0.620       | 5.00         | 0.520 | 4.00   | 0.251  | 5.00    | 0.471       | 4.85        | 0.41 ± 0.16 | 4.62 ± 0.48 | 5000  | 0.982       | 1.46        |           |      | 1.000     | 5.00      | 1.000        | 0.59        | 1.000       | 0.64        | 1.00 ± 0.01 | 2.07 ± 2.09 |       |      |       |      |             |             |
|              |               | 1         | 0.562       | 5.00         | 0.372 | 5.00   | 0.184  | 5.00    | 0.277       | 5.00        | 0.28 ± 0.16 | 5.00 ± 0.00 | 2500  | 0.467       | 2.29        |           |      | 1.000     | 5.00      | 0.936        | 0.95        | 0.759       | 1.12        | 0.90 ± 0.24 | 2.36 ± 1.87 |       |      |       |      |             |             |
|              | 0.5           | 0.427     | 5.00        | 0.237        | 5.00  | 0.081  | 5.00   | 0.191   | 5.00        | 0.17 ± 0.14 | 5.00 ± 0.00 | 1250        | 0.404 | 1.60        | 0.575       |           | 1.49 | 0.682     | 0.89      | 0.157        | 1.47        | 0.47 ± 0.23 | 1.28 ± 0.32 |             |             |       |      |       |      |             |             |
|              | 0.25          | 0.299     | 5.00        | 0.177        | 5.00  | -0.014 | 5.00   | 0.217   | 5.00        | 0.13 ± 0.13 | 5.00 ± 0.00 | 625         | 0.388 | 1.18        | 0.475       |           | 1.04 | 0.636     | 0.65      | 0.111        | 1.33        | 0.41 ± 0.22 | 1.01 ± 0.29 |             |             |       |      |       |      |             |             |
|              | 0.125         | 0.233     | 5.00        | 0.164        | 5.00  | -0.016 | 5.00   | 0.182   | 5.00        | 0.11 ± 0.11 | 5.00 ± 0.00 | 313         | 0.418 | 0.83        | 0.545       |           | 0.48 | 0.617     | 0.52      | 0.125        | 1.02        | 0.43 ± 0.22 | 0.67 ± 0.26 |             |             |       |      |       |      |             |             |
|              | 2             | 0.590     | 5.00        | 0.476        | 5.00  | 0.134  | 5.00   | 0.398   | 4.66        | 0.34 ± 0.19 | 4.89 ± 0.17 | 5000        | 0.958 | 1.77        | 1.000       |           | 5.00 | 1.000     | 5.00      | 1.000        | 0.71        | 1.00 ± 0.02 | 3.57 ± 2.21 |             |             |       |      |       |      |             |             |
|              | 1             | 0.518     | 5.00        | 0.438        | 4.37  | 0.035  | 5.00   | 0.205   | 5.00        | 0.23 ± 0.22 | 4.79 ± 0.32 | 2500        | 0.393 | 2.30        | 0.999       |           | 0.04 | 0.938     | 0.93      | 0.633        | 1.21        | 0.86 ± 0.28 | 0.72 ± 0.93 |             |             |       |      |       |      |             |             |
|              | 0.5           | 0.309     | 5.00        | 0.199        | 5.00  | -0.092 | 5.00   | 0.108   | 5.00        | 0.07 ± 0.17 | 5.00 ± 0.00 | 1250        | 0.372 | 1.38        | 0.475       |           | 1.89 | 0.535     | 0.94      | 0.069        | 1.62        | 0.36 ± 0.21 | 1.48 ± 0.41 |             |             |       |      |       |      |             |             |
|              | 0.25          | 0.106     | 5.00        | 0.091        | 5.00  | -0.036 | 5.00   | 0.080   | 5.00        | 0.04 ± 0.07 | 5.00 ± 0.00 | 625         | 0.399 | 0.81        | 0.481       |           | 0.96 | 0.424     | 0.76      | 0.064        | 1.20        | 0.32 ± 0.19 | 0.97 ± 0.20 |             |             |       |      |       |      |             |             |
|              | 0.125         | 0.072     | 5.00        | 0.178        | 5.00  | 0.007  | 5.00   | 0.050   | 5.00        | 0.08 ± 0.07 | 5.00 ± 0.00 | 313         | 0.383 | 0.60        | 0.346       |           | 0.77 | 0.359     | 0.70      | 0.052        | 1.10        | 0.25 ± 0.16 | 0.86 ± 0.22 |             |             |       |      |       |      |             |             |
|              | 2             | 0.577     | 5.00        | 0.437        | 5.00  | 0.138  | 5.00   | 0.330   |             |             |             |             |       |             |             |           |      |           |           |              |             |             |             |             |             |       |      |       |      |             |             |





**Detailed Drug Information - Alias, Mechanism, Source, and Concentrations**

| Agent                | Alias or Trade Name        | Target of Inhibition // Mechanism           | Vendor        | Product # | MW (g/mol)    | Concentrations in Synergy (5x5) Experiments |           |                 |
|----------------------|----------------------------|---------------------------------------------|---------------|-----------|---------------|---------------------------------------------|-----------|-----------------|
|                      |                            |                                             |               |           |               | Top Conc (ng/ml)                            | % of Cmax | Dilution Factor |
| <b>4HC</b>           | 4-Hydroxy Cyclophosphamide | DNA Crosslinking // DNA Damage              | US Biological | H9015     | <b>293.1</b>  | 5000                                        | 72        | 2.0             |
| <b>Actinomycin D</b> | Dactinomycin / Cosmegen®   | DNA intercalation // Inhibits RNA/DNA synth | Sigma-Aldrich | A9415     | <b>1255.4</b> | 1.0                                         | 1.0       | 2.0             |
| <b>AZD1775</b>       | MK1775                     | WEE1 // CDK1 activation                     | Selleck       | S1525     | <b>500.6</b>  | 500                                         | 61        | 2.0             |
| <b>Bortezomib</b>    | Velcade®                   | Proteasome                                  | Sequoia       | SRP02310b | <b>384.2</b>  | 10                                          | 8.0       | 1.5             |
| <b>Cabozantinib</b>  | XL184                      | Tyrosine Kinases (c-Met; VEGFR2)            | Selleck       | S1119     | <b>501.5</b>  | 2000                                        | 100       | 2.0             |
| <b>Etoposide</b>     | VP-16                      | Topoisomerase II // DNA Damage              | Selleck       | S1225     | <b>588.6</b>  | 5000                                        | 25        | 4.0             |
| <b>SN-38</b>         | Irinotecan metabolite      | Topoisomerase IB // DNA Damage              | Sequoia       | SRP02075e | <b>392.4</b>  | 5.0                                         | 17        | 2.0             |
| <b>Vinorelbine</b>   | Navelbine®                 | Microtubule polymerization // Anti-mitotic  | Selleck       | S4269     | <b>1079.1</b> | 4.0                                         | 3.0       | 2.0             |

Supplemental Table S2: Drug information table

**Cell Line Information**

| Line           | Histology | Source                                | Commercial Source          |
|----------------|-----------|---------------------------------------|----------------------------|
| <b>RD</b>      | Embryonal | Gift from Dr. Calvin K. Lee (Moffitt) | ATCC® CCL-136™             |
| <b>SMS-CTR</b> | Embryonal | Gift from Dr. Calvin K. Lee (Moffitt) | Not Commercially Available |
| <b>RH30</b>    | Alveolar  | Children's Oncology Group (COG)       | Not Commercially Available |
| <b>RH41</b>    | Alveolar  | Children's Oncology Group (COG)       | Not Commercially Available |

Supplemental Table S3: Cell line information table
